# Supplementary material for: Influence of Ni-related enzymes on the Ni cycle in the Southern Ocean: insights from isotopes and metagenomics
Source: Copernicus journal article supplement (doi:10.5194/egusphere-2025-6336), 2026-01-19
Supplement: Supplementary file 1 [file egusphere-2025-6336-supplement.pdf]

# Influence of Ni-related enzymes on the Ni cycle in the Southern Ocean: insights from isotopes and metagenomics

5 Nolwenn Lemaitre<sup>1,2\*</sup>, Emile Faure<sup>3,4\*</sup>, Ricardo Zamora<sup>2</sup>, Corey Archer<sup>2</sup>, Matthias Sieber<sup>2,5</sup>, Michael Ellwood<sup>6</sup>, Christel Hassler<sup>7,8</sup>, Yajuan Lin<sup>9,10,11</sup>, Nicolas Cassar<sup>10,11</sup>, Lois Maignien<sup>4,12</sup>, Derek Vance<sup>2</sup>

<sup>1</sup>LEGOS (CNRS/CNES/IRD/UT3), University of Toulouse, Toulouse, FR-31400, France

<sup>2</sup>Department of Earth and Planetary Sciences, Institute of Geochemistry and Petrology, ETH Zurich, Zurich, CH-8092, Switzerland

<sup>3</sup>Station Biologique de Roscoff, CNRS/Sorbonne University, Roscoff, FR-29680, France

10 <sup>4</sup>Univ Brest, CNRS, IFREMER, BEEP, Plouzané, FR-29280, France

<sup>5</sup>College of Marine Science, University of South Florida, St. Petersburg, FL-33701, USA

<sup>6</sup>Research School of Earth Sciences, Australian National University, Canberra, ACT-2601, Australia

<sup>7</sup>Institute of Earth Sciences, University of Lausanne, Lausanne, CH-1015, Switzerland

15 <sup>8</sup>School of Architecture, Civil & Environmental Engineering, Alpine and Polar Environmental Research Center, EPFL, Sion, CH-1951, Switzerland

<sup>9</sup>Department of Life Sciences, Texas A&M University Corpus Christi, Corpus Christi, TX-78412, USA

<sup>10</sup>Division of Earth and Climate Sciences, Nicholas School of the Environment, Duke University, Durham, NC-27708, USA

<sup>11</sup>CNRS, Univ Brest, IRD, Ifremer, LEMAR, Plouzané, FR-29280, France

<sup>12</sup>Bay Paul Center, Marine Biological Laboratory, Woods Hole, MA-02543, USA

20 *Correspondence to:* Nolwenn Lemaitre ([nol.lemaitre@gmail.com](mailto:nol.lemaitre@gmail.com)) and Emile Faure ([emile.faure@sb-roscoff.fr](mailto:emile.faure@sb-roscoff.fr))

\*These authors contributed equally to this work.

## Supplementary information about nitrogen fixation

### 1) Estimating the potential for nitrogen fixation

25 Anvi'o v7.1 was used to estimate the metabolic potential for nitrogen fixation in euphotic layer samples where significant Ni isotope fractionation was detected (stations 8, 11 and 25), using the commands and parameters described in <https://anvio.org/blog/targeted-binning/>. This approach relies on anvi-estimate-metabolism to estimate the completeness of KEGG modules in contigs of individual metagenomic samples, working at operon-level. It allows to detect complete or partial nitrogen fixation operons instead of traditional single-gene *nifH* detection.

30

### 2) Nitrogen fixation and Ni fractionation

Among the 13 omic samples corresponding to high  $\delta^{60}\text{Ni}$  (11-15m, 11-30m, 8-15m, 8-40m, 25-15m, 25-30m, each with two size fractions except 25-15 m which has three), none showed a contig bearing more than 50 % of the genes from the M00175 KEGG module, corresponding to the catalytic part of the *nif* based nitrogen fixation. Nitrogen fixation potential could have  
35 been missed due to single assemblies not properly recovering contigs of nitrogen-fixing populations. Yet, similar metagenomic-based approaches have demonstrated their efficiency (Delmont et al. 2022), and recent data has shown evidence

of limited nitrogen fixation in the Southern Ocean (Gu et al. 2025). Thus, the effect of nitrogen fixation on nickel fractionation in our samples should be negligible, if not absent.

#### 40 **References from Supplementary information**

Delmont, T. O., J. J. Pierella Karlusich, I. Veseli, J. Fuessel, A. M. Eren, R. A. Foster, C. Bowler, P. Wincker, E. Pelletier: Heterotrophic bacterial diazotrophs are more abundant than their cyanobacterial counterparts in metagenomes covering most of the sunlit ocean, *The ISME Journal*, 16: 927-936, doi: 10.1038/s41396-021-01135-1, 2022.

Gu, S., Berthelot H., Lin Y., Tang W., Robidart J., Eren A. M., Ducklow H. W., and Cassar N.: Evidence of limited N<sub>2</sub> fixation  
45 in the Southern Ocean, *Communications Earth & Environment* 6: 264. doi:10.1038/s43247-025-02225-0, 2025

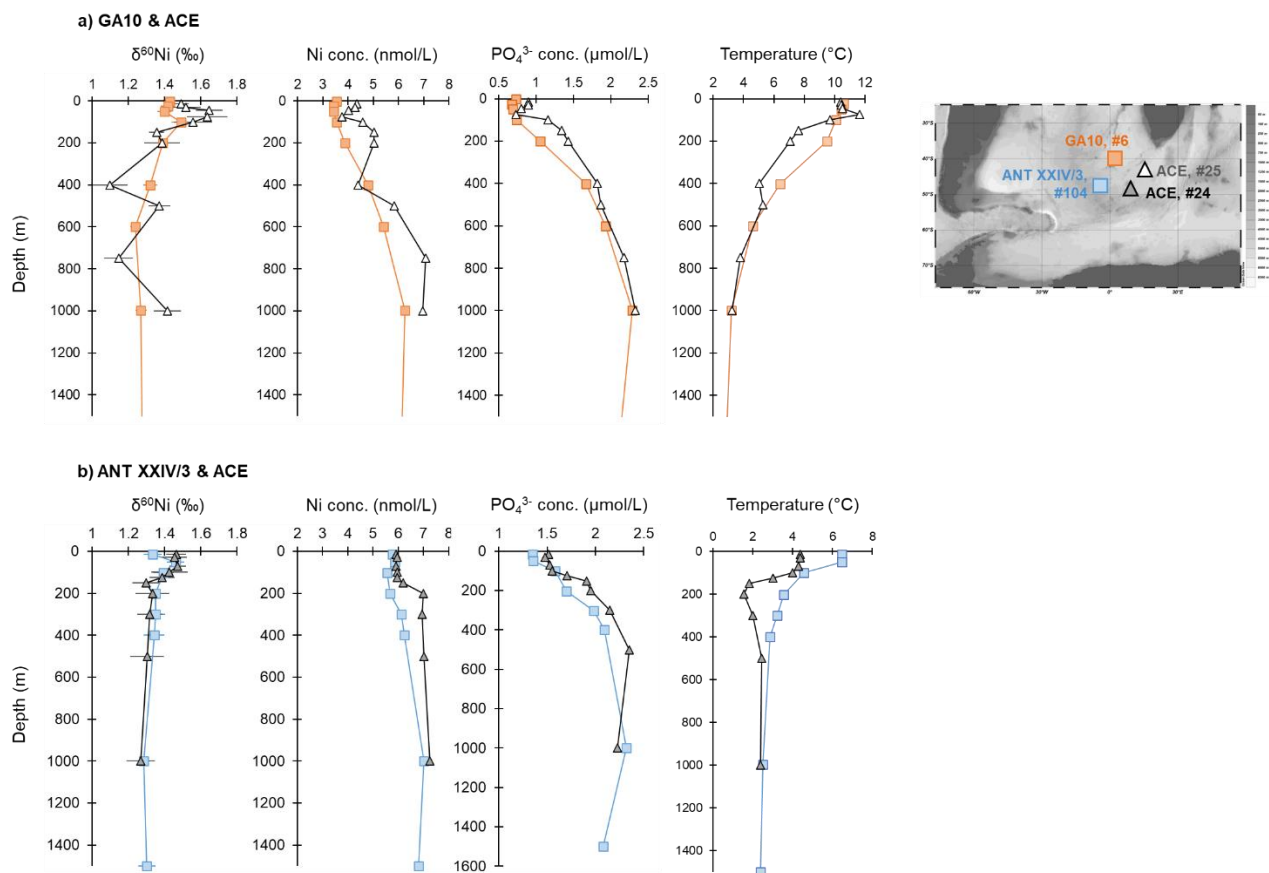

**Figure S1:** Comparison of depth profiles a) near the Sub-Tropical Front between ACE station #25 and GA10 station #6 (in orange; Archer et al., 2020), and b) near the Polar Front between ACE station #24 and ANT XXIV/3 station #104 (in blue; Cameron and Vance, 2014).

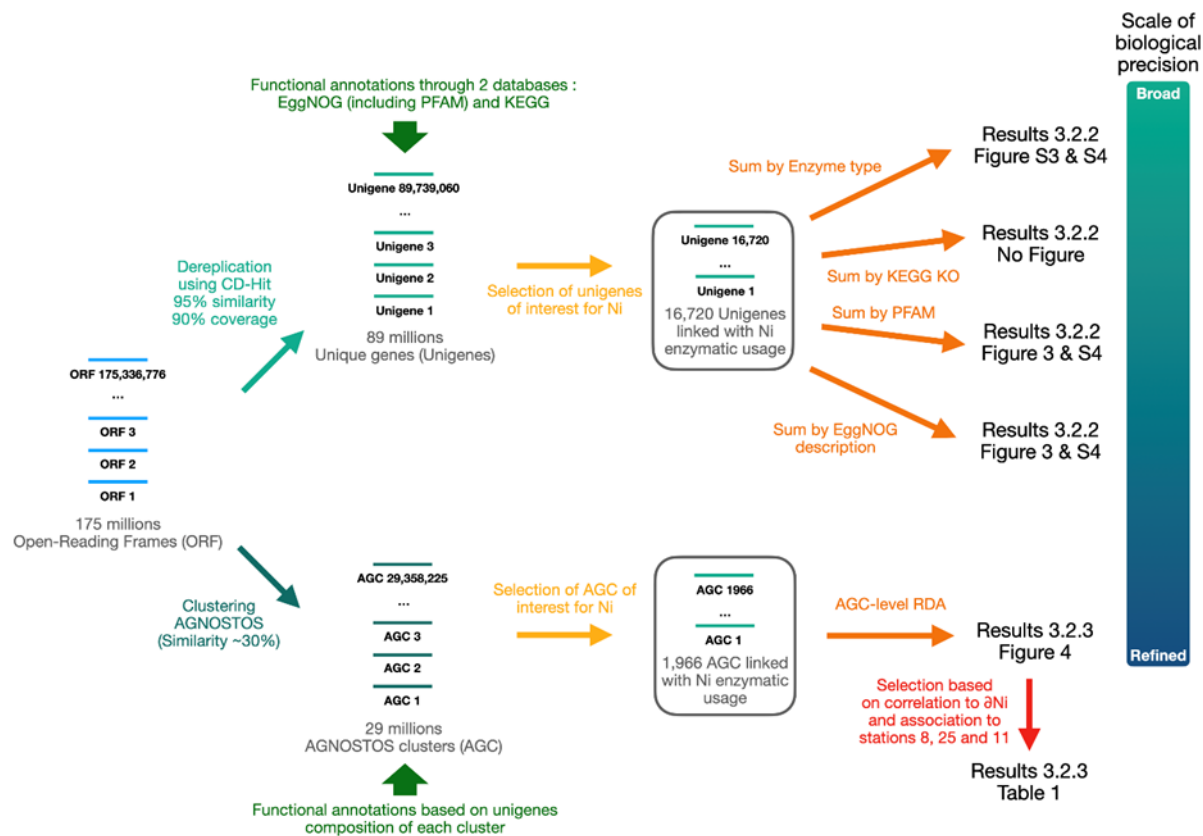

**Figure S2:** Schematic of the different methods applied to the metagenomic data from a broad biological scale (function-level investigation) to a refined biological scale (gene clusters-level investigation).

a) Small size fraction

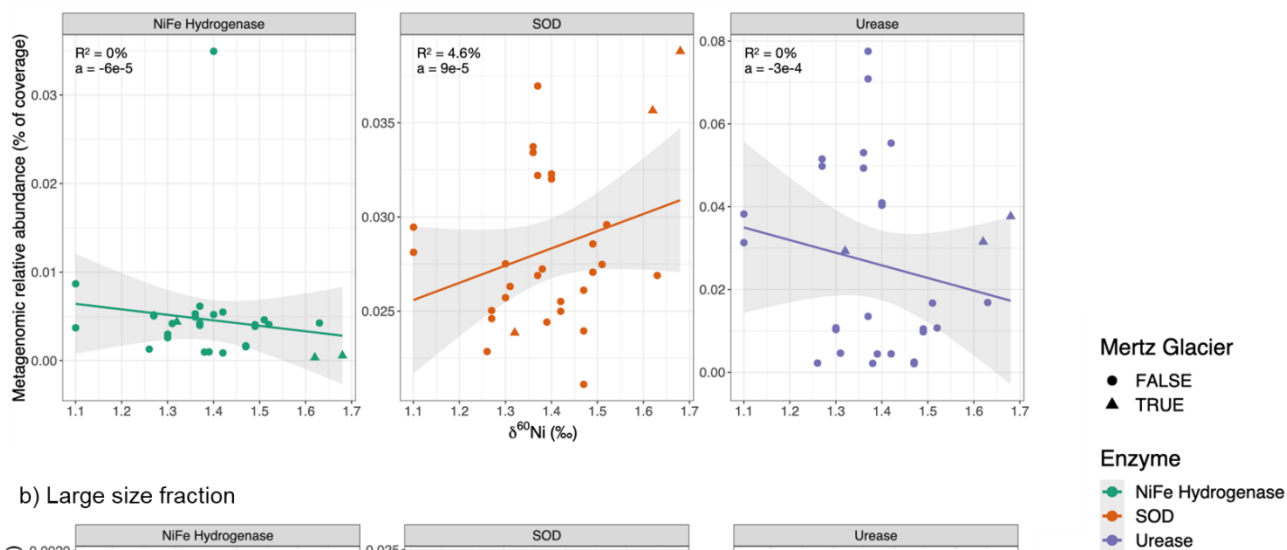

b) Large size fraction

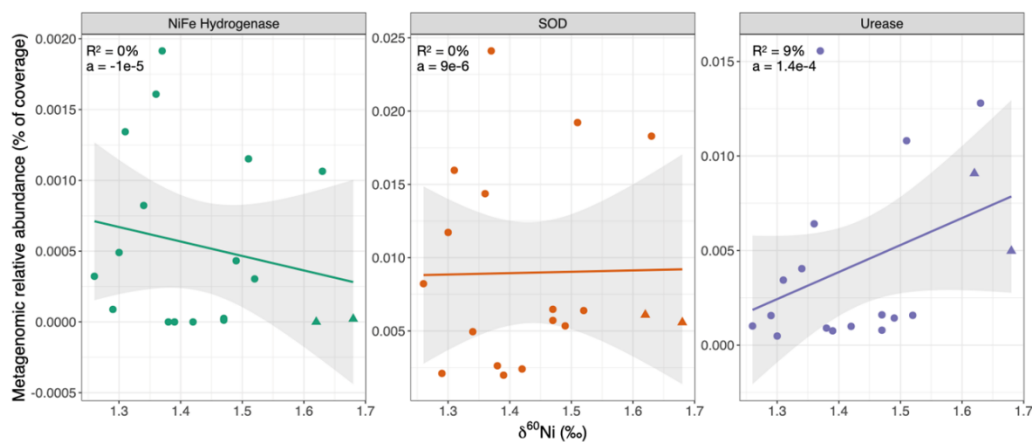

**Figure S3:** Comparison of Ni isotope composition ( $\delta^{60}\text{Ni}$ ) and metagenomic relative abundance of broad functional groups: NiFe hydrogenase (in green, left plots), SOD (in orange, middle plots) and urease (in purple, right plots) in a) the small size fraction (0.2 – 3  $\mu\text{m}$  and 0.2 – 40  $\mu\text{m}$ ; top panels) and b) large size fraction (3 – 200  $\mu\text{m}$ ; bottom panels). Samples from station 11, near the Mertz Glacier, are identified by triangle symbols. A regression line coloured by enzyme surrounded by a 95% confidence interval plotted in grey is represented for each plot.

a) Small size fraction

b) Large size fraction

c) Small size fraction

d) Large size fraction

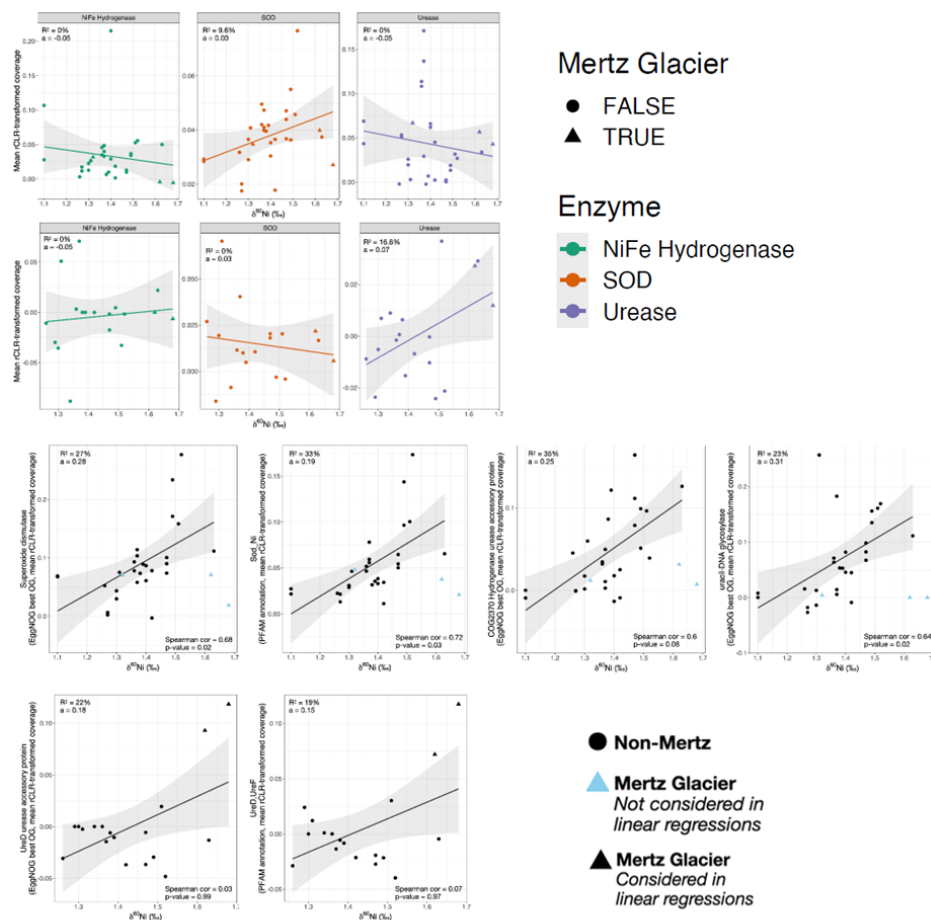

**Figure S4:** Comparison of Ni isotope composition ( $\delta^{60}\text{Ni}$ ) and robust Centered-Log Ratio (r-CLR) transformed metagenomic abundance of broad functional groups: NiFe hydrogenase (in green, left plots), SOD (in orange, middle plots) and urease (in purple, right plots) in panels a (small size fraction) and b (large size fraction); EggNOG best OG descriptions or PFAM annotations in panels c (small size fraction) and d (large size fraction). A regression line surrounded by a 95% confidence interval plotted in grey is represented for each plot. Light blue symbols were excluded from the computation of the linear regression lines. Samples from station 11, near the Mertz Glacier, are identified by triangle symbols.

| Station | Lat    | Long   | Depth | Potential density | Temperature | Salinity | Oxygen | Silicate | Nitrate | Phosphate | Ni     | $\delta^{60}\text{Ni}$ | 2SD  |
|---------|--------|--------|-------|-------------------|-------------|----------|--------|----------|---------|-----------|--------|------------------------|------|
| #       | °N     | °E     | m     | kg/m <sup>3</sup> | °C          | psu      | μmol/L | μmol/L   | μmol/L  | μmol/L    | nmol/L | ‰                      | ‰    |
| 8       | -46.39 | 150.39 | 15    |                   | 12.49       | 35.60    | 245.10 | 0.45     | 6.27    | 0.53      | 2.97   | 1.63                   | 0.08 |
| 8       | -46.39 | 150.39 | 40    | 26.41             | 12.14       | 34.80    | 249.48 | 0.41     | 6.43    | 0.51      | 3.13   | 1.51                   | 0.04 |
| 8       | -46.39 | 150.39 | 60    | 26.43             | 12.06       | 34.80    | 246.55 | 0.48     | 6.58    | 0.55      | 3.35   | 1.39                   | 0.10 |
| 8       | -46.39 | 150.39 | 80    | 26.45             | 11.96       | 34.80    | 244.24 | 0.73     | 8.08    | 0.60      | 3.54   | 1.40                   | 0.05 |
| 8       | -46.39 | 150.39 | 125   | 26.55             | 11.44       | 34.81    | 243.30 | 1.97     | 10.98   | 0.72      | 3.76   | 1.45                   | 0.11 |
| 8       | -46.39 | 150.39 | 150   | 26.69             | 10.71       | 34.82    | 241.08 | 2.90     | 11.94   | 0.79      | 3.68   | 1.37                   | 0.05 |
| 8       | -46.39 | 150.39 | 200   | 26.78             | 10.19       | 34.81    | 240.41 | 3.33     | 12.16   | 0.78      | 3.57   | 1.39                   | 0.08 |
| 8       | -46.39 | 150.39 | 250   | 26.78             | 10.17       | 34.81    | 240.94 | 3.30     | 12.11   | 0.79      | 3.55   | 1.31                   | 0.11 |
| 8       | -46.39 | 150.39 | 300   | 26.78             | 10.12       | 34.80    | 241.58 | 3.32     | 12.42   | 0.77      | 3.66   | 1.16                   | 0.07 |
| 8       | -46.39 | 150.39 | 500   | 26.83             | 8.91        | 34.60    | 236.07 | 4.78     | 16.11   | 0.96      | 4.13   | 1.24                   | 0.11 |
| 8       | -46.39 | 150.39 | 750   | 26.88             | 8.29        | 34.53    | 237.44 | 5.31     | 16.84   | 1.08      | 4.26   | 1.39                   | 0.09 |
| 9       | -53.58 | 149.30 | 15    | 26.55             | 8.00        | 34.07    | 271.37 | 5.58     | 18.57   | 1.20      | 5.00   | 1.31                   | 0.05 |
| 9       | -53.58 | 149.30 | 30    | 26.55             | 7.99        | 34.07    | 270.60 | 5.34     | 18.66   | 1.24      | 4.94   | 1.36                   | 0.06 |
| 9       | -53.58 | 149.30 | 50    | 26.76             | 7.59        | 34.26    | 270.30 | 5.42     | 18.65   | 1.19      | 4.82   | 1.37                   | 0.05 |
| 9       | -53.58 | 149.30 | 80    | 26.84             | 6.97        | 34.26    | 264.55 | 5.22     | 17.90   | 1.16      | 4.77   | 1.43                   | 0.07 |
| 9       | -53.58 | 149.30 | 125   | 26.87             | 6.89        | 34.28    | 258.61 | 5.86     | 19.38   | 1.10      | 4.77   | 1.48                   | 0.08 |
| 9       | -53.58 | 149.30 | 150   | 26.89             | 6.84        | 34.29    | 252.38 | 6.56     | 20.53   | 1.16      | 4.81   | 1.40                   | 0.07 |
| 9       | -53.58 | 149.30 | 200   | 26.91             | 6.24        | 34.22    | 257.33 | 8.13     | 22.13   | 1.32      | 4.94   | 1.32                   | 0.04 |
| 9       | -53.58 | 149.30 | 250   | 26.94             | 5.98        | 34.21    | 251.86 | 9.41     | 22.97   | 1.37      | 5.09   | 1.19                   | 0.08 |
| 9       | -53.58 | 149.30 | 300   | 26.97             | 5.82        | 34.23    | 242.66 | 11.33    | 24.35   | 1.36      | 5.54   | 1.20                   | 0.06 |
| 9       | -53.58 | 149.30 | 500   | 27.11             | 4.82        | 34.25    | 213.17 | 21.72    | 29.22   | 1.76      | 5.62   | 1.28                   | 0.09 |
| 9       | -53.58 | 149.30 | 750   | 27.29             | 3.60        | 34.31    | 191.51 | 40.70    | 33.51   | 2.01      | 6.34   | 1.15                   | 0.06 |
| 9       | -53.58 | 149.30 | 1000  | 27.44             | 2.97        | 34.43    | 167.45 | 60.14    | 34.80   | 2.10      | 6.80   | 1.09                   | 0.08 |
| 10      | -59.61 | 148.64 | 30    | 27.04             | 2.90        | 33.93    | 309.21 | 22.86    | 25.88   | 1.66      |        |                        |      |
| 10      | -59.61 | 148.64 | 50    | 27.20             | 1.45        | 33.98    | 317.80 | 33.95    | 27.88   | 1.91      | 6.52   | 1.37                   | 0.08 |
| 10      | -59.61 | 148.64 | 80    | 27.38             | -0.49       | 34.07    | 323.40 | 39.11    | 28.54   | 1.98      | 6.50   | 1.26                   | 0.06 |
| 10      | -59.61 | 148.64 | 100   | 27.41             | -0.62       | 34.09    | 318.07 | 42.35    | 29.04   | 1.99      | 6.59   | 1.24                   | 0.10 |
| 10      | -59.61 | 148.64 | 125   | 27.48             | 0.22        | 34.23    | 267.85 | 53.62    | 32.39   | 2.15      | 6.68   | 1.30                   | 0.06 |
| 10      | -59.61 | 148.64 | 150   | 27.53             | 1.33        | 34.38    | 199.81 | 64.98    | 34.62   | 2.28      | 6.69   | 1.10                   | 0.04 |
| 10      | -59.61 | 148.64 | 200   | 27.58             | 1.79        | 34.48    | 175.61 | 71.28    | 34.99   | 2.27      | 6.88   | 1.20                   | 0.09 |
| 10      | -59.61 | 148.64 | 250   | 27.61             | 2.12        | 34.55    | 161.72 | 74.93    | 34.78   | 2.21      | 6.82   | 1.23                   | 0.07 |
| 10      | -59.61 | 148.64 | 500   | 27.71             | 2.11        | 34.67    | 164.68 | 80.34    | 32.62   | 2.07      | 6.79   | 1.40                   | 0.08 |
| 10      | -59.61 | 148.64 | 750   | 27.76             | 1.98        | 34.72    | 172.08 | 84.19    | 30.95   | 2.02      | 6.72   | 1.33                   | 0.08 |
| 11      | -67.10 | 144.92 | 15    | 26.16             | -0.99       | 32.53    | 372.04 | 38.12    | 10.02   | 0.62      | 4.95   | 1.68                   | 0.04 |
| 11      | -67.10 | 144.92 | 30    | 26.17             | -1.05       | 32.54    | 374.27 | 38.03    | 10.51   | 0.70      | 5.05   | 1.62                   | 0.04 |
| 11      | -67.10 | 144.92 | 50    | 26.23             | -1.22       | 32.61    | 376.15 | 40.81    | 11.78   | 0.78      | 5.05   | 1.65                   | 0.04 |
| 11      | -67.10 | 144.92 | 80    | 27.38             | -0.89       | 34.04    | 359.38 | 60.80    | 20.68   | 1.42      | 7.15   | 1.43                   | 0.05 |
| 11      | -67.10 | 144.92 | 100   | 27.61             | -1.43       | 34.30    | 313.04 | 69.52    | 25.49   | 1.73      | 7.08   | 1.36                   | 0.05 |
| 11      | -67.10 | 144.92 | 200   | 27.80             | -1.99       | 34.51    | 286.81 | 75.99    | 30.69   | 1.76      | 6.86   | 1.32                   | 0.03 |
| 11      | -67.10 | 144.92 | 250   | 27.80             | -2.00       | 34.51    | 286.42 | 77.39    | 30.78   | 1.88      | 7.74   | 1.32                   | 0.04 |
| 11      | -67.10 | 144.92 | 300   | 27.80             | -1.99       | 34.52    | 285.73 | 78.02    | 30.83   | 1.83      | 8.03   | 1.31                   | 0.06 |
| 11      | -67.10 | 144.92 | 400   | 27.82             | -2.01       | 34.54    | 285.56 | 77.94    | 30.77   | 1.81      | 6.86   | 1.30                   | 0.04 |
| 11      | -67.10 | 144.92 | 475   | 27.84             | -2.08       | 34.56    | 286.70 | 77.55    | 30.75   | 1.92      | 7.93   | 1.36                   | 0.08 |
| 22      | -56.99 | -27.95 | 10    | 27.00             | 1.66        | 33.75    | 312.80 | 49.58    | 23.58   | 1.63      | 5.86   | 1.32                   | 0.06 |
| 22      | -56.99 | -27.95 | 30    | 27.00             | 1.67        | 33.75    | 312.02 | 49.65    | 23.58   | 1.62      | 6.39   | 1.38                   | 0.04 |
| 22      | -56.99 | -27.95 | 60    | 27.33             | 0.07        | 34.04    | 303.87 | 55.12    | 24.73   | 1.73      | 7.35   | 1.36                   | 0.05 |
| 22      | -56.99 | -27.95 | 85    | 27.49             | -0.85       | 34.18    | 284.17 | 72.09    | 28.50   | 2.01      | 6.33   | 1.36                   | 0.06 |
| 22      | -56.99 | -27.95 | 100   | 27.53             | -0.70       | 34.24    | 267.05 | 76.42    | 30.30   | 2.18      | 7.61   | 1.36                   | 0.05 |
| 22      | -56.99 | -27.95 | 150   | 27.66             | 0.14        | 34.45    | 223.55 | 86.35    | 32.17   | 2.21      | 6.09   | 1.34                   | 0.07 |
| 22      | -56.99 | -27.95 | 200   | 27.73             | 0.56        | 34.56    | 202.47 | 91.69    | 32.20   | 2.22      | 6.23   | 1.20                   | 0.09 |
| 22      | -56.99 | -27.95 | 300   | 27.78             | 0.80        | 34.64    | 191.58 | 97.63    | 32.10   | 2.21      | 6.10   | 1.34                   | 0.10 |
| 22      | -56.99 | -27.95 | 500   | 27.79             | 0.68        | 34.65    | 190.49 | 104.04   | 32.18   | 2.20      | 8.29   | 1.28                   | 0.07 |
| 22      | -56.99 | -27.95 | 800   | 27.81             | 0.55        | 34.66    | 190.11 | 111.28   | 32.32   | 2.28      | 6.38   | 1.25                   | 0.08 |
| 22      | -56.99 | -27.95 | 1000  | 27.82             | 0.48        | 34.67    | 190.73 | 113.40   | 32.59   | 2.27      | 6.28   | 1.33                   | 0.09 |
| 23      | -58.67 | -14.00 | 15    | 26.92             | 1.85        | 33.67    | 314.40 | 49.41    | 23.08   | 1.62      | 6.39   | 1.39                   | 0.05 |
| 23      | -58.67 | -14.00 | 50    | 26.94             | 1.77        | 33.69    | 313.48 | 52.91    | 23.54   | 1.66      | 6.44   | 1.42                   | 0.06 |
| 23      | -58.67 | -14.00 | 60    | 26.99             | 1.39        | 33.71    | 314.36 | 57.50    | 24.13   | 1.72      | 6.47   | 1.38                   | 0.09 |
| 23      | -58.67 | -14.00 | 100   | 27.39             | -0.83       | 34.06    | 312.27 | 64.78    | 27.18   | 1.95      | 6.62   | 1.37                   | 0.06 |
| 23      | -58.67 | -14.00 | 125   | 27.49             | -0.82       | 34.18    | 280.40 | 73.72    | 30.04   | 1.95      | 7.07   | 1.31                   | 0.06 |
| 23      | -58.67 | -14.00 | 150   | 27.57             | -0.32       | 34.31    | 252.61 | 80.09    | 31.06   | 2.18      | 6.93   | 1.29                   | 0.06 |
| 23      | -58.67 | -14.00 | 250   | 27.73             | 0.79        | 34.58    | 193.77 | 88.28    | 31.78   | 2.17      | 7.36   | 1.33                   | 0.10 |
| 23      | -58.67 | -14.00 | 500   | 27.80             | 0.72        | 34.66    | 188.30 | 104.45   | 31.87   | 2.25      | 7.33   | 1.27                   | 0.06 |
| 23      | -58.67 | -14.00 | 750   | 27.82             | 0.59        | 34.67    | 185.87 | 111.51   | 31.88   | 2.23      | 7.31   | 1.38                   | 0.08 |
| 23      | -58.67 | -14.00 | 1000  | 27.82             | 0.49        | 34.67    | 187.62 | 114.67   | 32.22   | 2.29      | 7.40   | 1.32                   | 0.08 |
| 24      | -49.00 | 9.00   | 15    | 26.79             | 4.39        | 33.79    | 292.61 | 3.33     | 20.33   | 1.52      | 5.92   | 1.47                   | 0.05 |
| 24      | -49.00 | 9.00   | 30    | 26.79             | 4.38        | 33.80    | 293.11 | 3.35     | 20.41   | 1.48      | 5.95   | 1.46                   | 0.07 |
| 24      | -49.00 | 9.00   | 70    | 26.81             | 4.28        | 33.80    | 292.17 | 3.45     | 20.27   | 1.53      | 5.92   | 1.47                   | 0.05 |
| 24      | -49.00 | 9.00   | 100   | 26.85             | 4.00        | 33.82    | 290.96 | 4.17     | 20.43   | 1.56      | 5.95   | 1.43                   | 0.10 |
| 24      | -49.00 | 9.00   | 125   | 26.98             | 3.01        | 33.87    | 291.48 | 11.47    | 22.34   | 1.71      | 5.97   | 1.39                   | 0.07 |
| 24      | -49.00 | 9.00   | 150   | 27.15             | 1.81        | 33.95    | 286.76 | 20.79    | 25.91   | 1.91      | 6.21   | 1.30                   | 0.08 |
| 24      | -49.00 | 9.00   | 200   | 27.21             | 1.56        | 34.01    | 277.80 | 27.00    | 28.06   | 1.95      | 7.01   | 1.33                   | 0.09 |
| 24      | -49.00 | 9.00   | 300   | 27.30             | 1.99        | 34.16    | 228.50 | 36.67    | 30.53   | 2.15      | 6.96   | 1.32                   | 0.07 |
| 24      | -49.00 | 9.00   | 500   | 27.45             | 2.45        | 34.38    | 175.12 | 58.56    | 33.54   | 2.35      | 7.03   | 1.30                   | 0.09 |
| 24      | -49.00 | 9.00   | 1000  | 27.67             | 2.38        | 34.65    | 161.78 | 74.70    | 31.81   | 2.23      | 7.25   | 1.27                   | 0.08 |
| 25      | -43.98 | 14.07  | 15    | 26.37             | 10.42       | 34.34    | 256.34 | 1.14     | 11.43   | 0.90      | 4.34   | 1.49                   | 0.04 |
| 25      | -43.98 | 14.07  | 30    | 26.37             | 10.43       | 34.34    | 255.68 | 1.12     | 11.50   | 0.90      | 4.27   | 1.52                   | 0.08 |
| 25      | -43.98 | 14.07  | 45    | 26.37             | 10.52       | 34.36    | 255.70 | 1.25     | 9.82    | 0.81      | 4.03   | 1.65                   | 0.07 |
| 25      | -43.98 | 14.07  | 75    | 26.40             | 11.68       | 34.67    | 244.19 | 1.37     | 8.65    | 0.74      | 3.75   | 1.64                   | 0.11 |
| 25      | -43.98 | 14.07  | 100   | 26.50             | 9.71        | 34.35    | 253.28 | 2.18     | 14.93   | 1.16      | 4.59   | 1.56                   | 0.10 |
| 25      | -43.98 | 14.07  | 150   | 26.74             | 7.62        | 34.24    | 253.40 | 5.65     | 18.77   | 1.34      | 5.04   | 1.36                   | 0.04 |
| 25      | -43.98 | 14.07  | 200   | 26.86             | 7.08        | 34.30    | 245.31 | 7.17     | 20.37   | 1.43      | 5.02   | 1.39                   | 0.10 |
| 25      | -43.98 | 14.07  | 400   | 27.03             | 5.04        | 34.19    | 228.42 | 12.21    | 26.39   | 1.82      | 4.39   | 1.10                   | 0.10 |
| 25      | -43.98 | 14.07  | 500   | 27.10             | 5.28        | 34.31    | 203.15 | 21.21    | 27.59   | 1.87      | 5.84   | 1.37                   | 0.06 |
| 25      | -43.98 | 14.07  | 750   | 27.26             | 3.79        | 34.30    | 189.86 | 34.64    | 30.94   | 2.18      | 7.08   | 1.15                   | 0.08 |
| 25      | -43.98 | 14.07  | 1000  | 27.40             | 3.25        | 34.41    | 170.12 | 51.53    | 33.14   | 2.33      | 6.95   | 1.42                   | 0.08 |

**Table S1:** Dissolved  $\delta^{60}\text{Ni}$ , Ni concentrations, silicate, nitrate, phosphate, potential density ( $\sigma_\theta$ ), temperature and salinity for 8 stations of the ACE cruise.

|                    | Size fraction | AGNOSTOS genecluster | Size | Ug/NGO host cell description                                                                                                                                                                                                                              | IFAM               | Highest Taxonomy (Unifast90)                   | Remarks on Unifast Taxonomy                                                                               | Taxonomy (OT26, no <i>alkaliphiles</i> )                                                                                                                                                                                                                            |
|--------------------|---------------|----------------------|------|-----------------------------------------------------------------------------------------------------------------------------------------------------------------------------------------------------------------------------------------------------------|--------------------|------------------------------------------------|-----------------------------------------------------------------------------------------------------------|---------------------------------------------------------------------------------------------------------------------------------------------------------------------------------------------------------------------------------------------------------------------|
| 6 <sup>th</sup> Ni | small         | AGC_14548066         | 14   | Required for maturation of urase via the functional incorporation of the urase nickel metallocenter                                                                                                                                                       | UreF               | Unifast90                                      | Among annotated sequences, Rhodobacteraceae and Rhodobacteraceae from Chlorobacterium genus dominate      | 113 of 194 ORFs are annotated to Rhodobacteraceae configs. Dominant genus is Chlorobacterium 168 ORFs                                                                                                                                                               |
|                    | small         | AGC_2303241          | 12   | Required for maturation of urase via the functional incorporation of the urase nickel metallocenter                                                                                                                                                       | UreD               | Rhodobacteraceae                               |                                                                                                           | Mainly Rhodobacteraceae (58 ORFs), also Helicobacter, UBA2165 and other families with c1 ORFs. Main genera are Acidithiobacillus, Chlorobacterium, Leptothrix and Rhodospirillum                                                                                    |
|                    | both          | AGC_1490388          | 114  | Involved in urase metallocenter assembly. Binds nickel. Probably functions as a nickel donor during metallocenter assembly                                                                                                                                | UreF_C, UreH_N     | Unifast90                                      | Among annotated sequences, Rhodobacteraceae and Rhodobacteraceae dominate. UreF_C is the most found genus | 151 of 154 ORFs are annotated to Rhodobacteraceae configs. Dominant genera are Yersinia (40 ORFs), Neisseria (32 ORFs), Acidithiobacillus (23 ORFs) and Pasteurellales (13 ORFs)                                                                                    |
|                    | large         | AGC_2485293          | 81   | UreD-DNA glycoylase                                                                                                                                                                                                                                       | UDG                | Bacteria                                       | Only 20 Nickel-related ORFs, four distinct families majority of unknowns                                  | Among the 20 Nickel-related ORFs, 30 are Alphaproteobacteria and 8 Acidobacteria. 20 of the ORFs match to an Arctia Clade NMG (M00201 up to M0205), 8 to the psychrophilic Quaternaria strain                                                                       |
| Station 11         | small         | AGC_1708682          | 149  | UreD-DNA glycoylase                                                                                                                                                                                                                                       | UDG                | Unifast90                                      | Among annotated sequences, unknown: Nitrospirae and Rhodobacteraceae dominate                             | Nitrospirales (UBA837 genus) and Rhodobacteraceae (Yersinia genus)                                                                                                                                                                                                  |
|                    | small         | AGC_14355128         | 444  | Superoxide dismutase                                                                                                                                                                                                                                      | Sod_Ni             | Rhodobacteraceae; Polaribacter                 |                                                                                                           | Rhodobacteraceae (Mitsunobacter, Polaribacter, Psychrobacter, Paracoccus and Polaribacter genera)                                                                                                                                                                   |
|                    | small         | AGC_2598193          | 279  | Superoxide dismutase                                                                                                                                                                                                                                      | Sod_Ni             | Unifast90                                      | Among annotated sequences, Proteobacteria dominate (SAR2 family)                                          | Proteobacteria (MCC2207 genus)                                                                                                                                                                                                                                      |
|                    | small         | AGC_1819471          | 120  | Enzymes used in the DNA which can arise as a result of misincorporation of dUMP residues by DNA polymerase or due to deamination of cytosine. Deoxyribose radicals which are normally produced within the cells and which are toxic to biological systems | UDG                | Rhodobacteraceae                               |                                                                                                           | Rhodobacteraceae (SG201 genus)                                                                                                                                                                                                                                      |
|                    | small         | AGC_2288540          | 101  | Plan Secreted aspect of unknown function                                                                                                                                                                                                                  | Sod_Fe_C, Sod_Fe_N | Alphaproteobacteria; Glaciobacter              |                                                                                                           | 6 families, with at least 5 represented, Alphaproteobacteria and GCA-10172055 are the most represented                                                                                                                                                              |
|                    | small         | AGC_2652244          | 12   | Deoxyribose radicals which are normally produced within the cells and which are toxic to biological systems                                                                                                                                               | ORF                | Rhodobacteraceae; Polaribacter / Psychrobacter |                                                                                                           | Rhodobacteraceae (Polaribacter and Urethrobacter genera)                                                                                                                                                                                                            |
|                    | small         | AGC_1999524          | 12   | Plan Secreted aspect of unknown function                                                                                                                                                                                                                  | Sod_Fe_C, Sod_Fe_N | Rhodobacteraceae                               |                                                                                                           | Rhodobacteraceae (multiple genera including URM4-0277, TM204, UBA4461)                                                                                                                                                                                              |
|                    | small         | AGC_10331396         | 32   | Deoxyribose radicals which are normally produced within the cells and which are toxic to biological systems                                                                                                                                               | Sod_Fe             | Rhodobacteraceae; Psychrobacter                |                                                                                                           | Rhodobacteraceae (7 genera including Polaribacter, Neisseria, Celluliphaga and psychrobacter)                                                                                                                                                                       |
|                    | small         | AGC_19486454         | 10   | Deoxyribose radicals which are normally produced within the cells and which are toxic to biological systems                                                                                                                                               | Sod_Cu             | Rhodobacteraceae                               |                                                                                                           | Rhodobacteraceae (5 genera including GCA-02723355 and Psychrobacter)                                                                                                                                                                                                |
|                    | small         | AGC_2603242          | 14   | Deoxyribose radicals which are normally produced within the cells and which are toxic to biological systems                                                                                                                                               | Sod_Fe_C, Sod_Fe_N | Rhodobacteraceae; Polaribacter                 |                                                                                                           | Rhodobacteraceae (Polaribacter genus)                                                                                                                                                                                                                               |
|                    | small         | AGC_18121265         | 40   | Deoxyribose radicals which are normally produced within the cells and which are toxic to biological systems                                                                                                                                               | Sod_Cu             | Rhodobacteraceae; Polaribacter                 |                                                                                                           | Rhodobacteraceae (Polaribacter genus)                                                                                                                                                                                                                               |
|                    | small         | AGC_1269464          | 15   | Involved in urase metallocenter assembly. Binds nickel. Probably functions as a nickel donor during metallocenter assembly                                                                                                                                | UreF_C, UreH_N     | Unifast90                                      | Among annotated sequences, Rhodobacteraceae dominate                                                      | Rhodobacteraceae (mainly Chlorobacterium genus, also Acidithiobacillus, Pasteurellales and Proteobacteria)                                                                                                                                                          |
|                    | small         | AGC_14310140         | 42   | Deoxyribose radicals which are normally produced within the cells and which are toxic to biological systems                                                                                                                                               | Sod_Fe_C, Sod_Fe_N | Unifast90                                      | Among annotated sequences, unknown: Alphaproteobacteria dominate                                          | Mainly Alphaproteobacteria (Nitrospirales genus) and Chlorobacterium (CAMP01) and Glaciobacter genus                                                                                                                                                                |
|                    | large         | AGC_26466102         | 15   | Unifast90                                                                                                                                                                                                                                                 | Unifast90          | Unifast90                                      | Contains only one identified nickel ORF: UreD urase accessory protein from Rhodospirillum rubrum          | Not applied                                                                                                                                                                                                                                                         |
|                    | large         | AGC_26466101         | 15   | Unifast90                                                                                                                                                                                                                                                 | Unifast90          | Unifast90                                      | Contains only one identified nickel ORF: UreD urase accessory protein from Rhodospirillum rubrum          | Not applied                                                                                                                                                                                                                                                         |
|                    | large         | AGC_2144626          | 18   | UreD urase accessory protein, acting on superoxide radicals as acceptor                                                                                                                                                                                   | UreD               | Rhodobacteraceae; Psychrobacter                |                                                                                                           | Not applied                                                                                                                                                                                                                                                         |
|                    | large         | AGC_17228134         | 76   | UreD urase accessory protein, acting on superoxide radicals as acceptor                                                                                                                                                                                   | UreD               | Rhodobacteraceae; Psychrobacter                |                                                                                                           | Not applied                                                                                                                                                                                                                                                         |
|                    | large         | AGC_29126336         | 40   | UreD urase accessory protein, acting on superoxide radicals as acceptor                                                                                                                                                                                   | UreD               | Rhodobacteraceae; Psychrobacter                |                                                                                                           | Not applied                                                                                                                                                                                                                                                         |
|                    | large         | AGC_12715342         | 36   | Cu/Zn/Fe/Al, nucleotide-binding domain                                                                                                                                                                                                                    | UreD               | Rhodobacteraceae; Psychrobacter                |                                                                                                           | Not applied                                                                                                                                                                                                                                                         |
|                    | large         | AGC_12715342         | 36   | Cu/Zn/Fe/Al, nucleotide-binding domain                                                                                                                                                                                                                    | UreD               | Rhodobacteraceae; Psychrobacter                |                                                                                                           | Not applied                                                                                                                                                                                                                                                         |
| Stations 8 and 25  | small         | AGC_2334844          | 14   | Involved in the functional incorporation of the urase nickel metallocenter. This process requires GTP hydrolysis, probably affected by UreD                                                                                                               | UreF               | Rhodobacteraceae                               | Diverse families, Rhodobacteraceae, Rhodospirillum, Rhodospirillum,...                                    | Mainly Rhodobacteraceae, various genera (Yersinia, TM2020, Rhodospirillum, Rhodospirillum, ...)                                                                                                                                                                     |
|                    | small         | AGC_1494004          | 81   | Involved in the functional incorporation of the urase nickel metallocenter. This process requires GTP hydrolysis, probably affected by UreD                                                                                                               | UreF               | Rhodobacteraceae                               | Contains 5 distinct SOD, Ni ORFs                                                                          | Not applied                                                                                                                                                                                                                                                         |
|                    | small         | AGC_19380120         | 275  | Deoxyribose radicals which are normally produced within the cells and which are toxic to biological systems                                                                                                                                               | Sod_Fe_C, Sod_Fe_N | Rhodobacteraceae; Proteobacteria               |                                                                                                           | Mainly Rhodobacteraceae (133 ORFs), multiple genera incl. Rhodospirillum, AG-107-02 and Yersinia and Proteobacteria (55 ORFs, Proteobacteria)                                                                                                                       |
|                    | small         | AGC_11301382         | 30   | Deoxyribose radicals which are normally produced within the cells and which are toxic to biological systems                                                                                                                                               | Sod_Cu             | Rhodobacteraceae; Proteobacteria               |                                                                                                           | Not applied                                                                                                                                                                                                                                                         |
|                    | small         | AGC_2164130          | 80   | Superoxide dismutase                                                                                                                                                                                                                                      | Sod_Ni             | Unifast90                                      | Mainly Gammaproteobacteria, diverse families, Rhodospirillum, Alphaproteobacteria, Proteobacteria,...     | Mainly Gammaproteobacteria, diverse families, Rhodospirillum, Alphaproteobacteria, Proteobacteria,...                                                                                                                                                               |
|                    | small         | AGC_1742245          | 165  | IFAM Nickel-dependent hydrogenase, large subunit                                                                                                                                                                                                          | NifH, Hns          | Unifast90                                      | Among the few annotated sequences, Rhodobacteraceae dominate                                              | Mainly Rhodobacteraceae (80 ORFs), all annotated to UBA4461 up to UBA4462, a MAG from the North Sea and Rhodobacteraceae (38 ORFs, mainly M02-02A and Rhodospirillum)                                                                                               |
|                    | small         | AGC_18601609         | 11   | Deoxyribose radicals which are normally produced within the cells and which are toxic to biological systems                                                                                                                                               | Sod_Fe_C, Sod_Fe_N | Proteobacteria; Rhodospirillum                 |                                                                                                           | Not applied                                                                                                                                                                                                                                                         |
|                    | small         | AGC_1490388          | 114  | Urease activity                                                                                                                                                                                                                                           | UreD               | Unifast90                                      | Subfamily                                                                                                 | Not applied                                                                                                                                                                                                                                                         |
|                    | small         | AGC_1819471          | 120  | Copper chaperone for superoxide dismutase                                                                                                                                                                                                                 | UreD               | Rhodobacteraceae; Proteobacteria               |                                                                                                           | Not applied                                                                                                                                                                                                                                                         |
|                    | small         | AGC_1819471          | 120  | Involved in urase metallocenter assembly. Binds nickel. Probably functions as a nickel donor during metallocenter assembly                                                                                                                                | UreF_C, UreH_N     | Syntherobacteraceae; Syntherobacter            |                                                                                                           | Cyanothece (Syntherobacteraceae)                                                                                                                                                                                                                                    |
|                    | small         | AGC_2598193          | 279  | Urease accessory protein                                                                                                                                                                                                                                  | UreD               | Unifast90                                      | Among the few annotated sequences, Chlorobacterium and Rhodobacteraceae dominate                          | Not applied                                                                                                                                                                                                                                                         |
|                    | small         | AGC_2630654          | 11   | Nickel-containing superoxide dismutase                                                                                                                                                                                                                    | Sod_Ni             | Proteobacteria; Proteobacteria                 |                                                                                                           | Not applied                                                                                                                                                                                                                                                         |
|                    | small         | AGC_29126336         | 40   | Nickel-containing superoxide dismutase                                                                                                                                                                                                                    | Sod_Ni             | Unifast90                                      | Diverse families, Rhodospirillum, Proteobacteria,...                                                      | Diverse families, from two main orders: Proteobacteria (syn. Rhodospirillum) and Proteobacteria. Main genera are UBA4461 (74 ORFs) and M02-02A (54 ORFs)                                                                                                            |
|                    | small         | AGC_4130332          | 42   | Plan Secreted aspect of unknown function                                                                                                                                                                                                                  | ORF                | Proteobacteria                                 |                                                                                                           | All ORFs annotated to UBA4461 (74 ORFs) and M02-02A (54 ORFs), Proteobacteria (in NGS)                                                                                                                                                                              |
|                    | small         | AGC_2800756          | 25   | UreD urase accessory protein, acting on superoxide radicals as acceptor                                                                                                                                                                                   | UreD               | Proteobacteria                                 | Only 3 nickel-related ORF                                                                                 | All nickel-related ORFs annotated to UBA4461                                                                                                                                                                                                                        |
|                    | small         | AGC_2526244          | 21   | Plan Secreted aspect of unknown function                                                                                                                                                                                                                  | ORF                | Proteobacteria                                 |                                                                                                           | 19 of the 20 nickel-related ORFs annotated to UBA4461                                                                                                                                                                                                               |
|                    | small         | AGC_2020650          | 18   | UreD urase accessory protein, acting on superoxide radicals as acceptor                                                                                                                                                                                   | UreD               | Proteobacteria                                 | Only 1 nickel-related ORF                                                                                 | Nickel-related ORF is annotated to UBA4461                                                                                                                                                                                                                          |
|                    | small         | AGC_2773151          | 40   | Plan Secreted aspect of unknown function                                                                                                                                                                                                                  | ORF                | Proteobacteria                                 | Only 1 nickel-related ORF                                                                                 | 14 of the 15 nickel-related ORFs annotated to UBA4461                                                                                                                                                                                                               |
|                    | small         | AGC_1030042          | 17   | UreD urase accessory protein, acting on superoxide radicals as acceptor                                                                                                                                                                                   | UreD               | Proteobacteria                                 | Only 1 nickel-related ORF                                                                                 | M02-02A genus                                                                                                                                                                                                                                                       |
|                    | small         | AGC_1030042          | 17   | UreD urase accessory protein, acting on superoxide radicals as acceptor                                                                                                                                                                                   | UreD               | Proteobacteria                                 | Only 1 nickel-related ORF                                                                                 | M02-02A genus                                                                                                                                                                                                                                                       |
|                    | small         | AGC_21403403         | 76   | UreD urase accessory protein, acting on superoxide radicals as acceptor                                                                                                                                                                                   | UreD               | Proteobacteria                                 | Only 1 nickel-related ORF                                                                                 | M02-02A genus                                                                                                                                                                                                                                                       |
|                    | small         | AGC_11294157         | 36   | Plan Secreted aspect of unknown function                                                                                                                                                                                                                  | ORF                | Proteobacteria                                 | Only 1 nickel-related ORF                                                                                 | M02-02A genus                                                                                                                                                                                                                                                       |
|                    | both          | AGC_1819471          | 120  | Urease activity                                                                                                                                                                                                                                           | UreD               | Unifast90                                      | Blend of Proteobacteria, Thaumetochloraceae and others                                                    | 19 ORFs annotated as Aschaeae from the Nitrospirales family, 39 ORFs annotated as various proteobacteria (incl. Alphaproteobacteria and Rhodobacteraceae)                                                                                                           |
|                    | both          | AGC_1719447          | 149  | Deoxyribose radicals which are normally produced within the cells and which are toxic to biological systems                                                                                                                                               | Sod_Fe_C, Sod_Fe_N | Unifast90                                      | Among annotated sequences, Rhodobacteraceae and Proteobacteria dominate                                   | Mainly Rhodobacteraceae (321 ORFs), from various genera, most dominant being Rhodospirillum (805 ORFs)                                                                                                                                                              |
|                    | large         | AGC_1803210          | 1230 | Involved in urase metallocenter assembly. Binds nickel. Probably functions as a nickel donor during metallocenter assembly                                                                                                                                | UreF_C, UreH_N     | Unifast90                                      | Among annotated sequences, Rhodobacteraceae, Rhodospirillum and Alphaproteobacteria dominate              | Wide variety of bacteria, multiple classes: gammaproteobacteria (526 ORFs), alphaproteobacteria (158 ORFs), Nitrospirae (277 ORFs), most dominant families are VA-1 (Nitrospirales order, 277 ORFs), Rhodobacteraceae (150 ORFs) and Alphaproteobacteria (113 ORFs) |
|                    | large         | AGC_104008           | 12   | Urease accessory protein                                                                                                                                                                                                                                  | UreD               | Proteobacteria; Proteobacteria                 |                                                                                                           | Not applied                                                                                                                                                                                                                                                         |
|                    | large         | AGC_1719447          | 149  | Urease accessory protein                                                                                                                                                                                                                                  | UreD               | Proteobacteria; Proteobacteria                 |                                                                                                           | Not applied                                                                                                                                                                                                                                                         |
|                    | large         | AGC_1512034          | 251  | Urease activity                                                                                                                                                                                                                                           | UreD               | Proteobacteria; Proteobacteria                 |                                                                                                           | Not applied                                                                                                                                                                                                                                                         |
|                    | large         | AGC_2629552          | 11   | Superoxide dismutase copper chaperone activity                                                                                                                                                                                                            | UreD               | Proteobacteria; Proteobacteria                 |                                                                                                           | Not applied                                                                                                                                                                                                                                                         |
|                    | large         | AGC_17255101         | 81   | Required for maturation of urase via the functional incorporation of the urase nickel metallocenter                                                                                                                                                       | UreF               | Unifast90                                      | Blend of Proteobacteria, Cyanothece (Syntherobacteraceae) and Nitrospirae                                 | The main classes, Gammaproteobacteria (486 ORFs), main genera Proteobacteria and UBA4461 (74 ORFs), Nitrospirae (277 ORFs), most dominant families are VA-1 (Nitrospirales order, 277 ORFs), Rhodobacteraceae (150 ORFs) and Alphaproteobacteria (113 ORFs)         |

**Table S2: Functional and taxonomic annotations of all AGNOSTOS gene clusters (AGC) emerging from the redundancy analyses as particularly linked to  $\delta^{60}\text{Ni}$  (shown in yellow in Figure 4), station 11 (shown in red in Figure 4) and stations 8 and 25 (shown in orange in Figure 4), for the small (0.2 - 3  $\mu\text{m}$  and 0.2 - 40  $\mu\text{m}$ ) and large (3 - 200  $\mu\text{m}$ ) size fractions.**
